# Supplementary material for: Impact of Co-Existing Placental Pathologies in Pregnancies Complicated by Placental Abruption and Acute Neonatal Outcomes
Source: MDPI journal article supplement (doi:10.3390/jcm10235693), 2021-12-03
Supplement: s1 [file s1]

## **Supplementary Material (S1) Placental lesion definitions**

### **Lesion Definitions**

MVM was defined as the presence of at least two of the following features, provided that one feature was accelerated villous maturation away from infarction (#3), or decidual vasculopathy (#4)

#### **MVM definition**

- 1) placental weight < 10th percentile;
- 2) infarction;
- 3) accelerated villous maturation away from infarction; and
- 4) decidual vasculopathy

#### **FVM definition**

FVM was defined as thrombosis or avascular villi on their own, or any two features of thrombosis, avascular villi, or intramural fibrin deposition.

#### **VUE definition**

Any placenta presenting with features of MVM or FVM in addition to chronic villitis was categorized as villitis.
